# Supplementary material for: Competing needs: a qualitative study of cervical cancer screening attendance among HPV-positive women in Tanzania
Source: PubMed Central journal article supplement — BMJ Open. 2019 Feb 27;9(2):e024011. doi: 10.1136/bmjopen-2018-024011 (PMC6398757; doi:10.1136/bmjopen-2018-024011), 2019-02-27
Supplement: bmjopen-2018-024011supp001.pdf [file bmjopen-2018-024011supp001.pdf]

**INTERVIEW GUIDE: “ATTITUDE TOWARDS SMS INTERVENTION AND REASONS FOR NON-ATTENDANCE FOR FOLLOW-UP SCREENING APPOINTMENT”**

*Qualitative study in Dar es Salaam, Tanzania 2017 (sub-study under the CONCEPT project)*

**Translation:** *My name is XX. I am a researcher from XX and would like to interview you. As I do not speak swahili, XX will act as translator for me. XX works at XX as XX.*

**Introduction:** *This interview is about cervical cancer screening attendance and receiving health educative text messages on your mobile phone. This study is part of the research project CONCEPT that wants to make cervical cancer prevention better in Tanzania. There are no right or wrong answers, and if there is anything you feel uncomfortable about you do not have to answer. If you have any questions, please feel free to ask us at any time.*

**Anonymity:** *You will anonymous and your name will not be used.*

**Time:** *This interview will take around 30-60 min.*

**Tape-recording:** *There is a recorder on my phone, which tapes our voices. The recorder will help us afterwards when we need to remember what we have learned from this interview. Is it okay with you that we tape this interview?*

**Informed consent:** *Before we start the interview, I would like to go through this paper with you. It is called “informed consent” and explains why we do this interview and what we will use it for. If everything sounds okay with you, please sign this document before we start.*

## **Interview Questions**

### **Introduction**

1. Tell me about your health – how do you feel? (*good/bad?*)
2. How is your family doing?

### **Transition**

***Part of our research to make cervical cancer prevention better is to send SMS,***

3. Have you received any SMS on your phone within the last year?

### **Key Questions Attitude SMS**

4. How did you find receiving SMS'?
5. What was most helpful about receiving SMS'?
6. What was most annoying about receiving SMS'? (*Why?*)
7. How did you react when you received an SMS? (*Why?*)
8. What did you like better in the SMS: Health information or appointment reminders? (*Why?*)
9. How do you think other women would feel about receiving SMS? (*Why?*)

**When you are the clinic you shown this scale of smileys (show likert scale) and had to choose one in relation to how you feel about receiving SMS.**

10. If you were to choose a smiley today, which one would you choose? (*Why?*)

### **Key Questions Understanding SMS**

11. How easy/hard was it to understand the SMS'? (*Please explain to me*)
12. In general, do you think women understand what the SMS say?

### **Key Questions SMS use**

13. Have you changed your mobile phone number with the last 1,5 year?
14. Do you share your phone with anyone? (*Who?*)

15. How often do you send and receive SMS?
16. Do you find it hard to read SMS? (*Why?*)
17. How often do you not have any battery charge or no reception on your phone?

### **Key Questions Barriers for Screening Attendance**

**At the clinic we see that a lot of women do not show up for their scheduled screening,**

18. Why do you think that is?
19. How do you think other women feel about being screened for cervical cancer?
20. What could keep women from not attending screening? (*Why?*)
21. What would motivate women to come to screening?
22. Do you think women find it important to attend screening appointments at the clinic? (*Why?*)
23. What could keep you from coming to the clinic?

### **Key Questions Barriers for SMS to be effective**

**At the clinic, we also see that even though we send women SMS, most often they still do not show up in time for their scheduled appointment,**

24. Why do you think that is?
25. What could we do to make the SMS better so that more women will come to screening?
26. Did the SMS help you remember your appointment?
27. Would you like to continue to receive SMS from the clinic? (*Why?*)

### **Closing Questions**

28. Is there anything else on your mind that you would like to talk about before we end the interview?

**I will now turn off the recorder and go through my notes. Thank you for your time and input. Everything that I have learned today has a great value and I am very grateful.**
