# Supplementary material for: Competing needs: a qualitative study of cervical cancer screening attendance among HPV-positive women in Tanzania
Source: PubMed Central journal article supplement — BMJ Open. 2019 Feb 27;9(2):e024011. doi: 10.1136/bmjopen-2018-024011 (PMC6398757; doi:10.1136/bmjopen-2018-024011), 2019-02-27
Supplement: bmjopen-2018-024011supp003.pdf [file bmjopen-2018-024011supp003.pdf]

# Concept

## Comprehensive Cervical Cancer Prevention in Tanzania

### INFORMED CONSENT FOR INTERVIEWS

*This informed consent form is for women who have already been enrolled into the research project “CONCPET” at Ocean Road Cancer Institute, Dar es Salaam, Tanzania, and who are invited to be interviewed after attending cervical cancer screening and receiving a SMS service. “CONCEPT” is organised by Ocean Road Cancer Institute and Kilimanjaro Christian Medical Center, Tanzania. Dr. Julius Mwaiselage is the primary investigator of “CONCEPT”, and Ditte Søndergaard Linde is the researcher responsible for the SMS service.*

**Research Description:** If there are any words that you do not understand in this form, please let me and I will stop so I can explain them to you. Cervical cancer makes many women sick in Tanzania. It is a disease that is caused by the virus Human Papilloma Virus (HPV). Women who are infected with HPV may develop cervical cancer over time. Cervical cancer can often be prevented through screening. In this study, we want to learn how women feel about cervical cancer screening and a SMS service in relation to the screening.

**Procedures:** This research will involve your participation in a personal interview. The interview will take place in your home, but if it is better for you, the interview can take place at a friend’s place or somewhere else you prefer. The interviews will be tape-recorded. The tape recordings will be stored at a safe computer, and the recordings will be kept until the research project finished in December 2018. Afterwards they will be destroyed.

**Duration:** The interview will take about 30-60 minutes.

**Confidentiality:** The information recorded during the interview is confidential, and no one else except for researcher, Ditte Linde, the interviewer, Devotha Kavaga, and a Tanzanian woman that will transcribe the interview will have access to the information documented during your interview. Your name will not be used in the further research, and anything you say during the interview will not be linked to your identity.

**Compensation:** There will be no compensation for participation in the study. A gift of gratitude will be given at the end of the interview as a thank you for your time.

**Voluntary participation:** Your participation in this interview is entirely voluntary; you are free to refuse to participate or to stop the interview at any time. You do not have to answer any questions, which you are uncomfortable with. Your routine health care from the health services will not be affected in any way if you leave the study or refuse to answer questions. We are just grateful to learn from your experiences.

**Contact information:** For more information or in case of any problems, please contact the following:

|                                                                                                                                                                                                       |                                                                                                                                                                                    |                                                                                                                                                               |
|-------------------------------------------------------------------------------------------------------------------------------------------------------------------------------------------------------|------------------------------------------------------------------------------------------------------------------------------------------------------------------------------------|---------------------------------------------------------------------------------------------------------------------------------------------------------------|
| Dr Julius Mwaiselage,<br>Director of Cancer Prevention Services,<br>Ocean Road Cancer Institute<br>Barack Obama Road,<br>P.O. Box 3295, Dar es Salaam, Tanzania<br>Tel: 022 2127597; Fax: 022 2118704 | Ditte Søndergaard Linde<br>PhD Student, CONCEPT<br>Ocean Road Cancer Institute<br>Barack Obama Road<br>P.O. Box 3295, Dar es Salaam, Tanzania<br>Email: dsondergaard@health.sdu.dk | Devotha Kovaga<br>Social worker/translator<br>Ocean Road Cancer Institute<br>Barack Obama Road<br>P.O. Box 3295, Dar es Salaam, Tanzania<br>Tel: 0715 031 008 |
|-------------------------------------------------------------------------------------------------------------------------------------------------------------------------------------------------------|------------------------------------------------------------------------------------------------------------------------------------------------------------------------------------|---------------------------------------------------------------------------------------------------------------------------------------------------------------|

**Certificate of Consent:**

I understand the information thus obtained will be kept confidential and will be used to assist in the fight against cervical cancer in Tanzania. I am willing to be interviewed about my cervical cancer screening and SMS service experiences. I allow for the interview to be tape-recorded.

I hereby express my willingness to participate in this study and to undergo the above procedures.

Thumb print

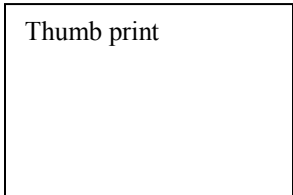

Name.....

Signature..... Date.....

**Study number.....**

**Facility name .....**

**Date .....**

**Health provider initials .....**
